# Supplementary material for: Intraspecific sequence comparisons reveal similar rates of non-collinear gene insertion in the B and D genomes of bread wheat
Source: PubMed Central journal article supplement (PMC3445842; doi:10.1186/1471-2229-12-155), 2012-08-30
Supplement: 1471-2229-12-155-S1.pdf [file 1471-2229-12-155-S1.pdf]

**Supplementary table 1.** List of EST and PCR primers used for BAC library screening and identification of contigs from target region.

| <b>EST</b> | <b>Forward primer</b>     | <b>Reverse primer</b>     |
|------------|---------------------------|---------------------------|
| BE398268   | GTGTAGATCTAAGGAAGGGCAGATT | GTATGTCTCCCACAGAAACTTGAAC |
| BE412128   | ACAGTCATCGGCAAGATTCC      | ACCCGGAATATCAATCACCA      |
| BE427255   | GTCCAATCCGGTCACTCATT      | CAGTCCACTGTCATCTGGT       |
| BE499148   | CAAGATCAAGAAGGCCAAGC      | AGGTACACCCCGTTCTCGAT      |
| BE606515   | GAGGTGCAGTTCCTCGTCTC      | GGTGAAGTCGACCATGGAGT      |
| BF484268   | CAAGATCAAGAAGGCCAAGC      | AGGTACACCCCGTTCTCGAT      |
| BJ222861   | ACAAGAAGCCGAGGATGATG      | AGGAAGAGCGAGTTGGTGAG      |
| BJ227880   | AGCGGCTACTCTCTGAGCAT      | GGACATGGGGCTCAAGTACA      |
| BJ303565   | AGAAGGCACAGGAAACATGG      | ACCCCTTCGCTCATCATCATC     |
| TC268917   | TTCAGTAACCACGGAGCTTT      | GAAAAAGGGAGGAGGTGTCC      |
| TC57899    | AGAAGAAGGAAGCCCCTCTG      | GCCATGTCTTTTGTGCCTTT      |
| TC57902    | AGGAGCCGCTCTATGTCCTT      | ATGCCAATCAGTTTCTGAGG      |
