# Supplementary material for: Intraspecific sequence comparisons reveal similar rates of non-collinear gene insertion in the B and D genomes of bread wheat
Source: PubMed Central journal article supplement (PMC3445842; doi:10.1186/1471-2229-12-155), 2012-08-30
Supplement: 1471-2229-12-155-S2.pdf [file 1471-2229-12-155-S2.pdf]

**Supplementary table 2.** Statistics of shotgun BAC clone sequencing and assemblies.

|          | BAC              | No. Reads | No. Bases  | Large contigs (>500) |           | N50    |
|----------|------------------|-----------|------------|----------------------|-----------|--------|
|          |                  |           |            | No. Contigs          | No. Bases |        |
| <b>A</b> | <b>cluster A</b> |           |            | <b>526</b>           |           |        |
| A01      | 45N17            | 33 917    | 11 298 470 | 28                   | 117 086   | 6 029  |
| A02      | 65O14            | 29 976    | 10 308 700 | 13                   | 66 945    | 7 017  |
| A03      | 08G17            | 6 687     | 1 872 659  | 22                   | 109 237   | 8 457  |
| A04      | 23I21            | 7 413     | 2 062 177  | 26                   | 133 101   | 7 332  |
| A05      | 72N17            | 39 219    | 13 157 697 | 24                   | 129 276   | 8 466  |
| A06      | 82H07            | 34 339    | 11 500 162 | 24                   | 119 045   | 7 552  |
| A07      | 72H10            | 30 531    | 10 411 681 | 14                   | 122 386   | 11 682 |
| A08      | 37C23            | 46 129    | 15 799 959 | 47                   | 156 944   | 8 860  |
| A09      | 31N24            | 34 949    | 11 127 314 | 43                   | 132 425   | 8 808  |
| A10      | 09G11            | 23 049    | 5 267 324  | 83                   | 83 961    | 913    |
| A11      | 04D04            | 18 230    | 5 953 506  | 29                   | 147 842   | 7 999  |
| A12      | 87O11            | 22 218    | 7 494 215  | 24                   | 135 574   | 8 679  |
| A13      | 58C08            | 19 305    | 6 503 956  | 17                   | 109 904   | 9 526  |
| A14      | 24N06            | 3 418     | 949 666    | 50                   | 98 423    | 3 274  |
| A15      | 11A13            | 7 979     | 2 231 454  | 15                   | 106 637   | 13 617 |
| A16      | 55O10            | 30 741    | 10 294 930 | 19                   | 129 525   | 10 073 |
| A17      | 15G21            | 7 485     | 2 103 329  | 18                   | 110 492   | 8 368  |
| A18      | 36F12            | 25 660    | 8 809 632  | 30                   | 121 030   | 6 749  |
| <b>B</b> | <b>cluster B</b> |           |            | <b>303</b>           |           |        |
| B01      | 52A05            | 16 440    | 5 427 047  | 36                   | 113 208   | 4 757  |
| B02      | 54D16            | 23 785    | 7 864 988  | 29                   | 115 899   | 5 496  |
| B03      | 53N07            | 33 238    | 10 972 361 | 59                   | 165 918   | 7 759  |
| B04      | 89C07            | 41 915    | 13 981 370 | 24                   | 116 721   | 8 036  |
| B05      | 90J06            | 29 625    | 9 989 963  | 155                  | 295 326   | 6 539  |
| <b>C</b> | <b>Singleton</b> |           |            |                      |           |        |
| C01      | 61C24            | 26 345    | 8 880 582  | 30                   | 110 624   | 6 300  |
