# Supplementary material for: Intraspecific sequence comparisons reveal similar rates of non-collinear gene insertion in the B and D genomes of bread wheat
Source: PubMed Central journal article supplement (PMC3445842; doi:10.1186/1471-2229-12-155), 2012-08-30
Supplement: 1471-2229-12-155-S4.pdf [file 1471-2229-12-155-S4.pdf]

**Supplementary table 3.** Promoter prediction for genes found at Hga locus at chromosome arm 3DS and at homoeologous region of chromosome 3B.‡

| Non-collinear genes     |                    |                 |                       |                    |                 |
|-------------------------|--------------------|-----------------|-----------------------|--------------------|-----------------|
| 3DS                     | TSS to Start codon | TATA-box to TSS | 3B                    | TSS to Start codon | TATA-box to TSS |
| Taa3DS_ctg1484.00020.1  | 797                | 17              |                       |                    |                 |
| Taa3DS_ctg1484.00040.1  |                    |                 |                       |                    |                 |
| Taa3DS_ctg1484.00050.1* |                    |                 |                       |                    |                 |
| Taa3DS_ctg447.00010.1   |                    |                 | TAA_ctg0954b.00180.1  | 606                | 38              |
| Taa3DS_ctg447.00020.1   | 468                | 38              | TAA_ctg0954b.00200.1  | 445                | 35              |
|                         |                    |                 | TAA_ctg0954b.00210.1  |                    |                 |
| Taa3DS_ctg447.00030.1   | 171                | 35              | TAA_ctg0954b.00215.1  | 172                | 37              |
| Taa3DS_ctg447.00040.1   |                    |                 | TAA_ctg0954b.00216.1* |                    |                 |
| Taa3DS_ctg447.00050.1   | 527                | 63              | TAA_ctg0954b.00220.1  | 387                | 18              |
| Taa3DS_ctg447.00070.1   | 728                | 28              | TAA_ctg0954b.00240.1  | 352                |                 |
| Taa3DS_ctg447.00090.1   | 133                | 38              | TAA_ctg0954b.00260.1  | 172                | 13              |
|                         |                    |                 | TAA_ctg0954b.00270.1  | 72                 | 38              |
| Taa3DS_ctg447.00100.1   |                    |                 | TAA_ctg0954b.00280.1  |                    |                 |
| Taa3DS_ctg447.00120.1   | 120                | 28              | TAA_ctg0954b.00300.1  | 126                | 28              |
| Taa3DS_ctg447.00140.1   |                    |                 | TAA_ctg0954b.00320.1  |                    |                 |
| Taa3DS_ctg447.00160.1   |                    |                 | TAA_ctg0954b.00340.1  | 702                | 29              |
|                         |                    |                 | TAA_ctg0954b.00350.1* |                    |                 |
| Taa3DS_ctg447.00170.1   |                    |                 | TAA_ctg0954b.00360.1  | 308                | 16              |
| Taa3DS_ctg447.00190.1   | 75                 | 14              |                       |                    |                 |
| Taa3DS_ctg447.00200.1   | 54                 | 35              | TAA_ctg0954b.00380.1  | 54                 | 35              |
| Taa3DS_ctg447.00220.1   |                    |                 | TAA_ctg0954b.00400.1* |                    |                 |
| Taa3DS_ctg447.00230.1   | 116                | 36              | TAA_ctg0954b.00410.1* |                    |                 |
| Taa3DS_ctg447.00240.1   | 248                | 33              |                       |                    |                 |
| Taa3DS_ctg447.00250.1   |                    |                 |                       |                    |                 |
| Taa3DS_ctg447.00260.1   | 66                 |                 |                       |                    |                 |
| Taa3DS_ctg447.00270.1   |                    |                 | TAA_ctg0954b.00415.1* |                    |                 |
| Taa3DS_ctg447.00320.1   | 326                | 37              | TAA_ctg0954b.00460.1  | 211                | 33              |
|                         |                    |                 | TAA_ctg0954b.00470.1  |                    |                 |
|                         |                    |                 | TAA_ctg0954b.00480.1  |                    |                 |

| Collinear genes         |                    |                 |                       |                    |                 |
|-------------------------|--------------------|-----------------|-----------------------|--------------------|-----------------|
| 3DS                     | TSS to Start codon | TATA-box to TSS | 3B                    | TSS to Start codon | TATA-box to TSS |
| Taa3DS_ctg1484.00010.1  |                    |                 | TAA_ctg0954b.00140.1  | 618                | 14              |
| Taa3DS_ctg1484.00030.1* | 853                |                 | TAA_ctg0954b.00150.1* |                    |                 |
| Taa3DS_ctg1484.00060.1  |                    |                 | TAA_ctg0954b.00160.1  |                    |                 |
| Taa3DS_ctg447.00060.1   | 604                | 14              | TAA_ctg0954b.00230.1  | 659                | 29              |
| Taa3DS_ctg447.00080.1   | 132                | 36              | TAA_ctg0954b.00250.1  | 118                | 34              |
| Taa3DS_ctg447.00110.1   | 229                | 37              | TAA_ctg0954b.00290.1  | 590                | 30              |
| Taa3DS_ctg447.00130.1   |                    |                 | TAA_ctg0954b.00310.1  |                    |                 |
| Taa3DS_ctg447.00150.1   | 885                | 36              | TAA_ctg0954b.00330.1  | 317                | 34              |
| Taa3DS_ctg447.00180.1   | 130                | 32              | TAA_ctg0954b.00370.1  | 51                 |                 |
| Taa3DS_ctg447.00210.1   |                    |                 | TAA_ctg0954b.00390.1  |                    |                 |
| Taa3DS_ctg447.00280.1   | 380                |                 | TAA_ctg0954b.00420.1  | 606                | 37              |
| Taa3DS_ctg447.00290.1   | 51                 |                 | TAA_ctg0954b.00430.1  | 475                | 33              |
| Taa3DS_ctg447.00300.1   | 155                |                 | TAA_ctg0954b.00440.1  | 112                |                 |
| Taa3DS_ctg447.00310.1   | 110                | 35              | TAA_ctg0954b.00450.1  | 101                | 35              |
| Taa3DS_ctg447.00330.1   | 148                | 35              | TAA_ctg0954b.00490.1  | 150                | 36              |

‡ Transcription start sites (TSS) and TATA-box sequence were identified upstream to start codon using TSSP (Shahmuradov *et al*, 2005). 1000 bp upstream to start codon were used for the analysis. Non-collinear genes specific for one genome are labelled red and genes shared between the homoeologous chromosomes 3D and 3B are labelled in blue. Pseudogenes and gene fragments are marked by an asterisk.
